# Supplementary material for: Oct4 transcriptionally regulates the expression of long non-coding RNAs NEAT1 and MALAT1 to promote lung cancer progression
Source: Mol Cancer. 2017 Jun 14;16:104. doi: 10.1186/s12943-017-0674-z (PMC5471675; doi:10.1186/s12943-017-0674-z)
Supplement: Additional file 1: Table S1. — Supplementary methods. Anchorage-independent growth assay, Tumor-sphere formation assay, Tumor formation assay, Western blot analysis. Table S1. The plasmids and their characteristics used in the current study. Table S2. The ChIP-PCR primers used in the current study. Table S3. The cDNA primers used in the current study. Table S4. The construction primers of promoters and enhancers used in the current study. Figure S1. Oct4 promoted lung cancer tumorigenesis in vitro and in vivo. A Anchorage-independent assays in empty vector stably-transfected cell line (vector) and two biological replicates of Oct4 stably-overexpressed A549 and CL1-0 cell lines (Oct4#1, Oct4#2). Results were photographed (left) and quantified (right). B Transwell migration and invasion assay analysis of stably-transfected cell lines in A549 and CL1-0 cells. Results were photographed (left) and quantified (right). P-values were determined by two-tailed Student’s t-test. *P < 0.05; **P < 0.01; ***P < 0.001. C In vitro tumor sphere formation assay of A549 lung cancer cells stably expressing Oct4#1 or vector photographed (top) and quantified (middle). In vivo tumor formation assay using limited cell number (100, 1000, and 5000 cells) of vector and Oct4#1 cells. Tumor incidence of mice was analyzed at 8 weeks after implantation. D The immunoblots (upper) and qRT-PCR (lower) confirmed Oct4 expression in A549 and CL1–0 stable clones. Figure S2. Expression of lncRNAs in CL1–0 lung cancer cells manipulated for Oct4. A, B qRT-PCR analysis of eight lncRNAs expression in CL1-0 cells stably overexpressing Oct4 (Oct4#1, Oct4#2) (A) or Oct4-silenced CL1-0 cells (si-Oct4#1, si-Oct4#2) (B). Target lncRNA expression levels were normalized to GAPDH expression levels. Data represent mean ± SEM. P-values were determined by two-tailed Student’s t-test. *P < 0.05; **P < 0.01; ***P < 0.001. Figure S3. Oct4 positively regulated NEAT1 and UCA1 lncRNAs transcription in normal bronchial epithelial BEAS-2B cells. qRT-PCR anal [file 12943_2017_674_MOESM1_ESM.pdf]

## **Additional file 1**

### **Oct4 transcriptionally regulates the expression of long non-coding RNAs *NEAT1* and *MALAT1* to promote lung cancer progression**

Jayu Jen<sup>1,2</sup>, Yen-An Tang<sup>1,2</sup>, Ying-Hung Lu<sup>1</sup>, Che-Chung Lin<sup>1</sup>, Wu-Wei Lai<sup>3</sup> and Yi-Ching Wang<sup>1,2\*</sup>

<sup>1</sup>Department of Pharmacology, College of Medicine, National Cheng Kung University, Tainan 701, Taiwan

<sup>2</sup>Institute of Basic Medical Sciences, College of Medicine, National Cheng Kung University, Tainan 701, Taiwan

<sup>3</sup>Division of Thoracic Surgery, Department of Surgery, National Cheng Kung University Hospital, College of Medicine, National Cheng Kung University, Tainan 701, Taiwan

## **Supplementary methods**

### **Anchorage-independent growth assay**

Anchorage-independent growth assay was performed by seeding A549 and CL1-0 at  $3 \times 10^3$  cells/well in 0.4% bactoagar on a bottom layer of solidified 0.6% bactoagar in 6-well plates. After 12~17 days for A549 cells and 7~10 days for CL1-0 cells, colonies consisted of  $> 30$  cells were counted.

### **Tumor-sphere formation assay**

Cells were expanded as spheres in a 10-cm ultra-low adhesion culture dish (Corning Inc., Corning, NY, USA) containing DMEM/F-12 with N2 supplement (Invitrogen), 20 ng/ml epithelial growth factor (EGF), and 20 ng/ml basic fibroblast growth factor (bFGF; PeproTech Inc., Rocky Hill, NJ, USA), referred to as stem cell medium. Tumor spheres consisting of  $> 30$  cells were counted and expressed as the means  $\pm$  SEM of triplicate within the same experiment.

### **Tumor formation assay**

5-6-week-old BALB/c nude female mice were subcutaneously implanted with varying number ( $1 \times 10^2$ ,  $1 \times 10^3$ , or  $5 \times 10^3$ ) of vector control (vector) or Oct4-stably expressing A549 cells (Oct4#1). Vector and Oct4#1 cells in 50  $\mu$ l Hanks' balanced salt solution (HBSS) were mixed with 50  $\mu$ l matrigel (2.5 mg/ml, Sigma-Aldrich, St. Louis, MO, USA), and then subcutaneously injected into the flanks of mice. The incidence of tumor formation was monitored within 8 weeks after implantation.

### **Western blot analysis**

Samples containing equal amounts of protein (50 µg) were separated on an 8% sodium dodecylsulphate-polyacrylamide gel electrophoresis (SDS-PAGE) and electroblotted onto Immobilon-P membranes (Millipore Co., Billerica, MA, USA). Immunoblotting was performed by incubating membranes with a 1:1000 dilution of anti-Oct4 antibody (Abcam, Cambridge, UK; Cat. ab-19857) overnight. GAPDH expression was used as internal control. Proteins expression was detected with indicated secondary antibody for 1 h at room temperature.

## Supplementary tables

**Table S1.** The plasmids and their characteristics used in the current study.

| Plasmid                          | Target                                    | Insert (bp) | Function                | Source                                          |
|----------------------------------|-------------------------------------------|-------------|-------------------------|-------------------------------------------------|
| pPyCAGIP-vector                  | -- <sup>c</sup>                           | 0           | Vector control          | From Dr. Ying Jin <sup>d</sup>                  |
| pPyCAGIP-Oct4                    | Wild-type Oct4                            | 1,083       | Overexpression          | From Dr. Ying Jin <sup>d</sup>                  |
| pMIR-REPORT-vector               | -- <sup>c</sup>                           | 0           | Vector control          | From Dr. Tetsuro Hirose <sup>e</sup>            |
| pMIR-REOPRT-NEAT1                | <i>NEAT1</i>                              | 3,756       | Overexpression          | From Dr. Tetsuro Hirose <sup>e</sup>            |
| pCMV-vector                      | -- <sup>c</sup>                           | 0           | Vector control          | From Dr. Kannanganattu V. Prasanth <sup>f</sup> |
| pCMV-MALAT1                      | <i>MALAT1</i>                             | 7,161       | Overexpression          | From Dr. Kannanganattu V. Prasanth <sup>f</sup> |
| pGL3-Basic vector                | -- <sup>c</sup>                           | 0           | Vector control          | Promega                                         |
| pGL3-NEAT1 WT <sup>a</sup>       | <i>NEAT1</i> promoter (WT)                | 4,422       | Promoter activity assay | Homemade                                        |
| pGL3-NEAT1 Mut <sup>b</sup>      | <i>NEAT1</i> promoter (Mut)               | 4,422       | Promoter activity assay | Homemade                                        |
| pGL3-MALAT1-pro                  | <i>MALAT1</i> promoter-luc                | 468         | Enhancer activity assay | Homemade                                        |
| pGL3-MALAT1-enh WT <sup>a</sup>  | <i>MALAT1</i> promoter-luc-enhancer (WT)  | 435         | Enhancer activity assay | Homemade                                        |
| pGL3-MALAT1-enh Mut <sup>b</sup> | <i>MALAT1</i> promoter-luc-enhancer (Mut) | 435         | Enhancer activity assay | Homemade                                        |
| pGL3-UCA1-pro                    | <i>UCA1</i> promoter-luc                  | 519         | Enhancer activity assay | Homemade                                        |
| pGL3-UCA1-enh WT <sup>a</sup>    | <i>UCA1</i> promoter-luc-enhancer (WT)    | 512         | Enhancer activity assay | Homemade                                        |
| pGL3-UCA1-enh Mut <sup>b</sup>   | <i>UCA1</i> promoter-luc-enhancer (Mut)   | 512         | Enhancer activity assay | Homemade                                        |

<sup>a</sup> WT: wild-type Oct4 binding sites within *NEAT1* promoter, *MALAT1* enhancer and *UCA1* enhancer<sup>b</sup> Mut: mutated Oct4 binding sites within *NEAT1* promoter, *MALAT1* enhancer and *UCA1* enhancer<sup>c</sup> Not applicable.<sup>d</sup> Plasmid was kindly provided by Dr. Ying Jin at Shanghai Stem Cell Institute, Shanghai Jiao Tong University School of Medicine, Shanghai, China.<sup>e</sup> Plasmid was kindly provided by Dr. Tetsuro Hirose at Institute for Genetic Medicine, Hokkaido University, Sapporo, Japan.<sup>f</sup> Plasmid was kindly provided by Dr. Kannanganattu V. Prasanth at Department of Cell and Developmental Biology, University of Illinois at Urbana-Champaign, Urbana, USA.

**Table S2.** The ChIP-PCR primers used in the current study.

| Gene           | Primer  | Sequences (5' → 3')                    | Application <sup>a</sup> | PCR size (bp) | Tm (°C) |
|----------------|---------|----------------------------------------|--------------------------|---------------|---------|
| <i>BACE1AS</i> | Forward | TGG TGG GTG TTG ACT GTG ACA            | ChIP-PCR                 | 150           | 54      |
|                | Reverse | AAA CTC ACC TGC CGA CAA GCT            |                          |               |         |
| <i>IGF2AS</i>  | Forward | CTC AAT TGT TTT GTG AAG GGA AAA        | ChIP-PCR                 | 157           | 50      |
|                | Reverse | AAT GTA CAT ATG GAC CCC CAA GTC        |                          |               |         |
| <i>MALAT1</i>  | Forward | CCT GGC CAC AGT TGC GTA T              | ChIP-PCR                 | 150           | 61      |
|                | Reverse | GTG AAC CGA GAT CGC AAC ACT            |                          |               |         |
| <i>NEAT1</i>   | Forward | AGG ACA GTT GGG AAG GAG GAA            | ChIP-PCR                 | 188           | 65      |
|                | Reverse | GTG CAC TCT CAG CCA CAC GTT            |                          |               |         |
| <i>SRA</i>     | Forward | GGG CAC AGT CCT GGA ATC AG             | ChIP-PCR                 | 150           | 61      |
|                | Reverse | AGT AGG GCA AGC GTT TTT ATC CT         |                          |               |         |
| <i>TUG1</i>    | Forward | ACC ACT TTG GCA GAG CCT TTT            | ChIP-PCR                 | 200           | 65      |
|                | Reverse | TGA ATG GGA ACA AGC ACA CAA            |                          |               |         |
| <i>UCA1</i>    | Forward | TGC TTC TGC TTC ATC CCA GTA G          | ChIP-PCR                 | 202           | 61      |
|                | Reverse | CCT GTA GCG GAG ACA GAG ACA GT         |                          |               |         |
| <i>GAS5</i>    | Forward | AAT GAT ATG TAA GAA AAG GAG GCT ATA GG | ChIP-PCR                 | 123           | 54      |
|                | Reverse | GAG GCT TGG GAA ATA GTG GTA GTA GA     |                          |               |         |

<sup>a</sup> ChIP-PCR: Chromatin immunoprecipitation coupled with polymerase chain reaction.

**Table S3.** The cDNA primers used in the current study.

| Gene           | Primer  | Sequences (5'→3')                  | Application <sup>a</sup> | PCR size (bp) | T <sub>m</sub> (°C) |
|----------------|---------|------------------------------------|--------------------------|---------------|---------------------|
| <i>BACE1AS</i> | Forward | GAA GGG TCT AAG TGC AGA CAT CTT    | qRT-PCR                  | 61            | 60                  |
|                | Reverse | AGG GAG GCG GTG AGA GT             |                          |               |                     |
| <i>GAPDH</i>   | Forward | GAG TCA ACG GAT TTG GTC GT         | qRT-PCR                  | 238           | 60                  |
|                | Reverse | TTG ATT TTG GAG GGA TCT CG         |                          |               |                     |
| <i>IGF2AS</i>  | Forward | AGC TCT GCT TGA CGA GGC CA         | qRT-PCR                  | 119           | 60                  |
|                | Reverse | TCT GTT GCA CCC TGG ACC CA         |                          |               |                     |
| <i>MALAT1</i>  | Forward | TCTCCCCACAAGCAACTTCT               | qRT-PCR                  | 150           | 60                  |
|                | Reverse | ACCTCGACACCATCGTTACC               |                          |               |                     |
| <i>NEAT1</i>   | Forward | TCG GGT ATG CTG TTG TGA AA         | qRT-PCR                  | 95            | 60                  |
|                | Reverse | TGA CGT AAC AGA ATT AGT TCT TAC CA |                          |               |                     |
| <i>Oct4</i>    | Forward | CGA AAG AGA AAG CGA ACC AG         | qRT-PCR                  | 157           | 60                  |
|                | Reverse | GCC GGT TAC AGA ACC ACA CT         |                          |               |                     |
| <i>SRA</i>     | Forward | AGG ATG GAT CCC CCA GAG T          | qRT-PCR                  | 87            | 60                  |
|                | Reverse | TGG GAG CCT TAC TTG AAG GAG        |                          |               |                     |
| <i>TUG1</i>    | Forward | TAG CAG TTC CCC AAT CCT TG         | qRT-PCR                  | 116           | 60                  |
|                | Reverse | CAC AAA TTC CCA TCA TTC CC         |                          |               |                     |
| <i>UCA1</i>    | Forward | CTT CTG CAT AGG ATC TGC AAT CAG    | qRT-PCR                  | 136           | 60                  |
|                | Reverse | TTT TGT CCC CAT TTT CCA TCA TAC G  |                          |               |                     |
| <i>GAS5</i>    | Forward | AGC TGG AAG TTG AAA TGG            | qRT-PCR                  | 149           | 60                  |
|                | Reverse | CAA GCC GAC TCT CCA TAC C          |                          |               |                     |

<sup>a</sup> qRT-PCR: Quantitative reverse-transcriptase polymerase chain reaction

**Table S4.** The construction primers of promoters and enhancers used in the current study.

| Gene <sup>a</sup>                        | Primer  | Sequences (5' → 3')                               | Application <sup>b</sup>      | PCR size (bp) | Tm (°C) |
|------------------------------------------|---------|---------------------------------------------------|-------------------------------|---------------|---------|
| <i>NEAT1</i> promoter WT                 | Forward | AAG GTA CCA GGA CAG TTG GGA AGG AGG AAG           | Promoter construct PCR        | 4,422         | 61      |
|                                          | Reverse | AGC TAG CCT TCC TCC CCC ACA ACT ACA CC            |                               |               |         |
| <i>NEAT1</i> promoter-1 <sup>c</sup> Mut | Forward | AAG GTA CCA GGA CAG TTG GGA AGG AGG AAG GGC CCG T | Site-directed mutagenesis PCR | 118           | 54      |
|                                          | Reverse | GCC CTG GTT TAC GGA TCC GAG GTG AGG TGA           |                               |               |         |
| <i>NEAT1</i> promoter-2 Mut              | Forward | TCA CCT CAC CTC GGA TCC GTA AAC CAG GGC           | Site-directed mutagenesis PCR | 4,334         | 54      |
|                                          | Reverse | AGC TAG CCT TCC TCC CCC ACA ACT ACA CCC AGG CGC   |                               |               |         |
| <i>MALAT1</i> promoter                   | Forward | AAG GTA CCA GAG CCG GTT AGA ACC AGT G             | Promoter construct PCR        | 468           | 61      |
|                                          | Reverse | CTA AGC TTT CCT CCA AAC CCC                       |                               |               |         |
| <i>MALAT1</i> enhancer WT                | Forward | TGG ATC CGC CTT CCA AAG TGC TGA GAT               | Enhancer construct PCR        | 435           | 54      |
|                                          | Reverse | CCC GTC GAC CCA ACA ACA ATG GCA AGA AA            |                               |               |         |
| <i>MALAT1</i> enhancer Mut               | Forward | TGA AGT GTC TGT TCA TCC CGG TTG TGT TTT TCT CTT   | Site-directed mutagenesis PCR | 5,721         | 54      |
|                                          | Reverse | AAG AGA AAA ACA CAA CCG GGA TGA ACA GAC ACT TCA   |                               |               |         |
| <i>UCA1</i> promoter                     | Forward | AAG GTA CCA GAA ATG ACC CAG GAG CTG A             | Promoter construct PCR        | 519           | 65      |
|                                          | Reverse | CTA AGC TTT CAG CGA AGG GAG ATA GGA G             |                               |               |         |
| <i>UCA1</i> enhancer WT                  | Forward | TGG ATC CTC ATC CCA GTA GGA GGC TCT               | Enhancer construct PCR        | 512           | 65      |
|                                          | Reverse | CCC GTC GAC ACG TGT GTG TGT GTT GGT TTT           |                               |               |         |
| <i>UCA1</i> enhancer Mut                 | Forward | ACT GAG CCC AAA TCG CCT TAT TTA TCC CTC           | Site-directed mutagenesis PCR | 5,849         | 50      |
|                                          | Reverse | GAG GGA TAA ATA AGG CGA TTT GGG CTC AGT           |                               |               |         |

<sup>a</sup> WT: Wild-type Oct4 binding site; Mut: Mutant Oct4 binding site<sup>b</sup> PCR: polymerase chain reaction<sup>c</sup> The PCR fragments promoter-1 and promoter-2 were ligated and then used to construct *NEAT1* promoter mutant vector.

## Supplementary figure and figure legend

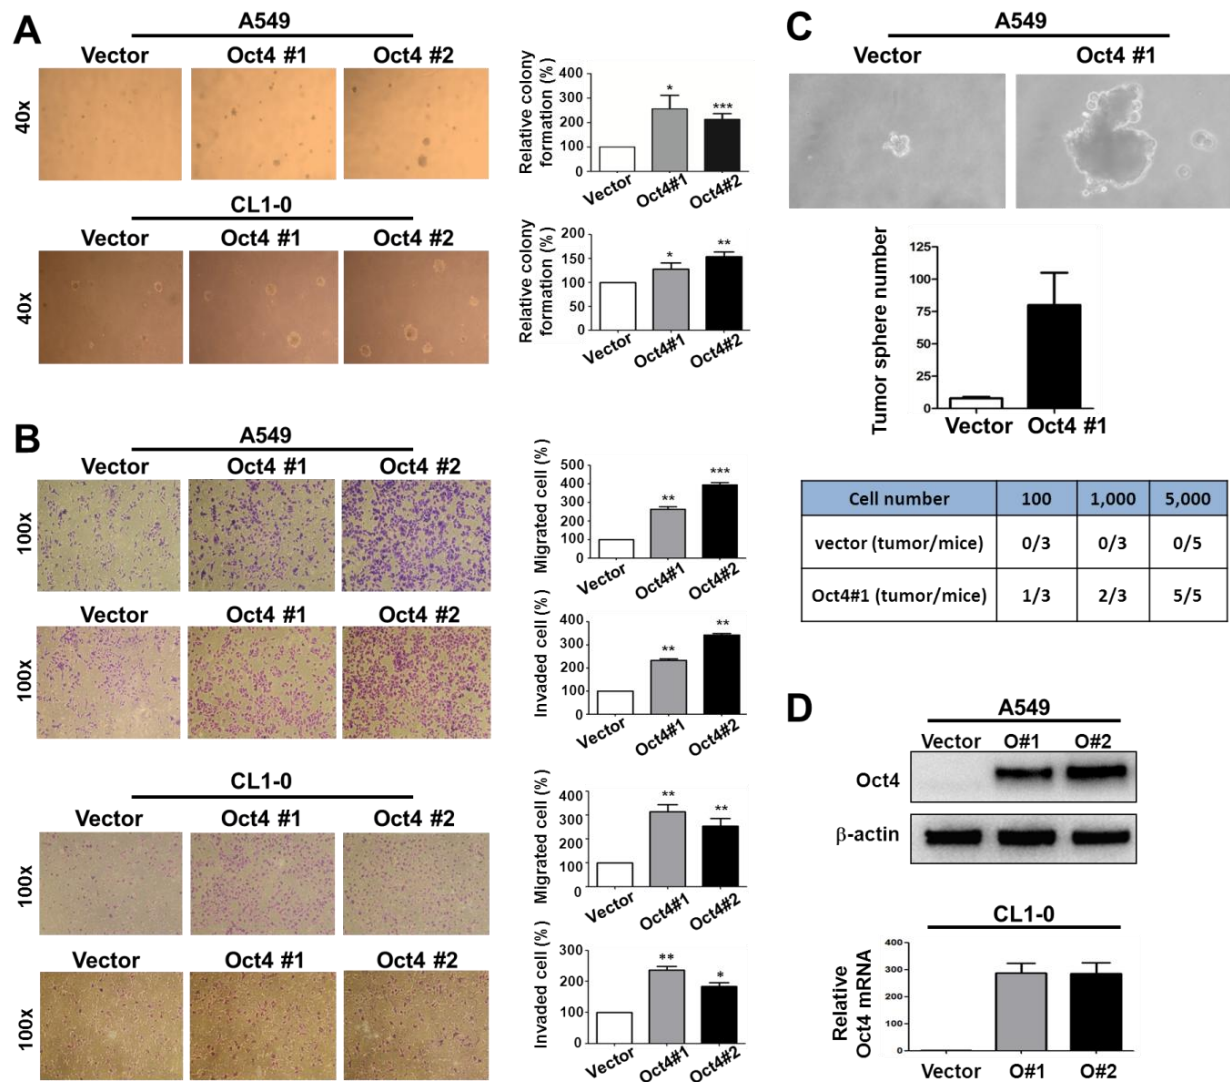

**Figure S1** Oct4 promoted lung cancer tumorigenesis *in vitro* and *in vivo*. **A** Anchorage-independent assays in empty vector stably-transfected cell line (vector) and two biological replicates of Oct4 stably-overexpressed A549 and CL1-0 cell lines (Oct4#1, Oct4#2). Results were photographed (left) and quantified (right). **B** Transwell migration and invasion assay analysis of stably-transfected cell lines in A549 and CL1-0 cells. Results were photographed (left) and quantified (right). *P*-values were determined by two-tailed Student's *t*-test. \**P* < 0.05; \*\**P* < 0.01; \*\*\**P* < 0.001. **C** *In vitro* tumor sphere formation assay of A549 lung cancer cells stably expressing Oct4#1 or vector photographed (top) and quantified (middle). *In vivo* tumor formation assay using limited cell number (100, 1000, and 5000 cells) of vector and Oct4#1 cells. Tumor incidence of mice was analyzed at 8 weeks after implantation. **D** The immunoblots (upper) and qRT-PCR (lower) confirmed Oct4 expression in A549 and CL1-0 stable clones.

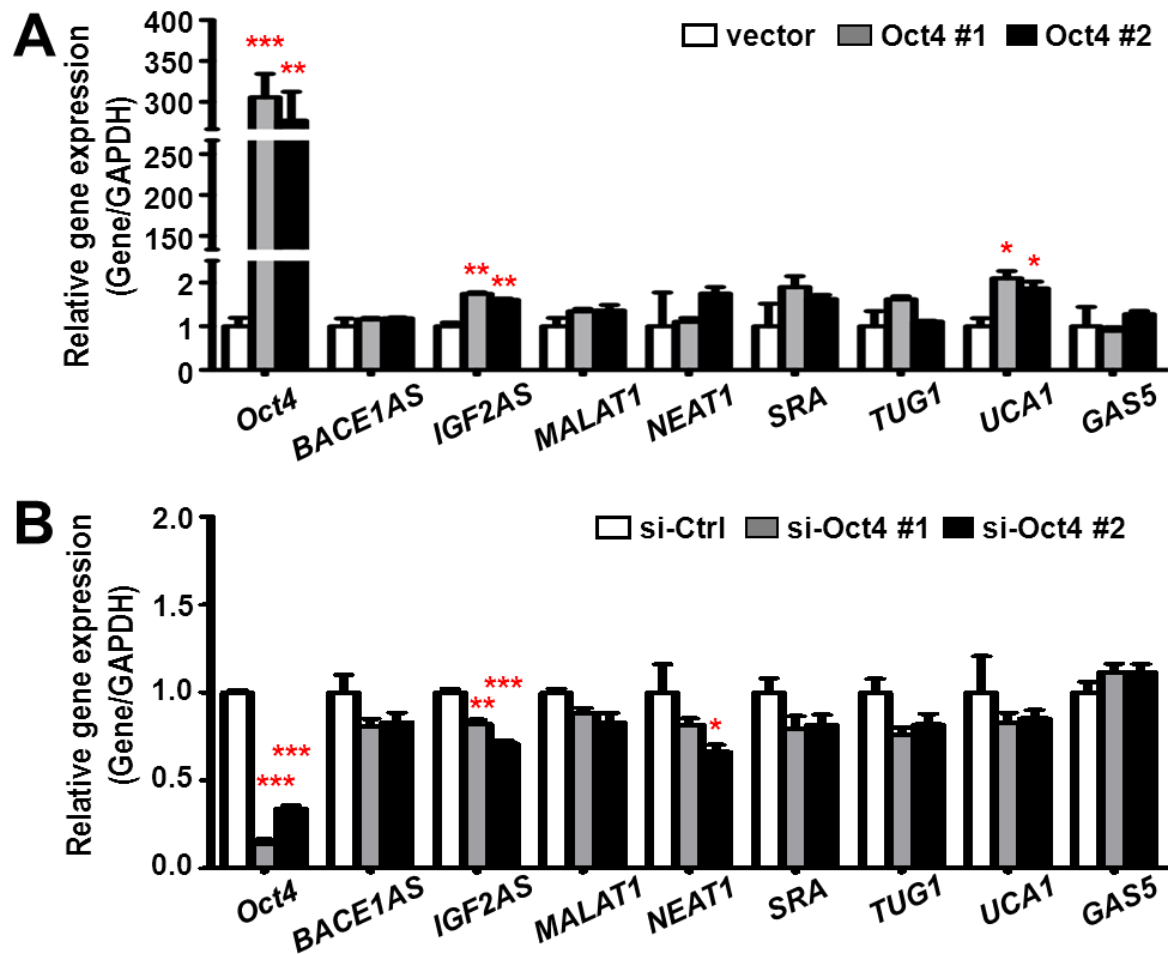

**Figure S2** Expression of lncRNAs in CL1-0 lung cancer cells manipulated for Oct4. **A, B** qRT-PCR analysis of eight lncRNAs expression in CL1-0 cells stably overexpressing Oct4 (Oct4#1, Oct4#2) (**A**) or Oct4-silenced CL1-0 cells (si-Oct4#1, si-Oct4#2) (**B**). Target lncRNA expression levels were normalized to *GAPDH* expression levels. Data represent mean  $\pm$  SEM. *P*-values were determined by two-tailed Student's *t*-test. \**P* < 0.05; \*\**P* < 0.01; \*\*\**P* < 0.001.

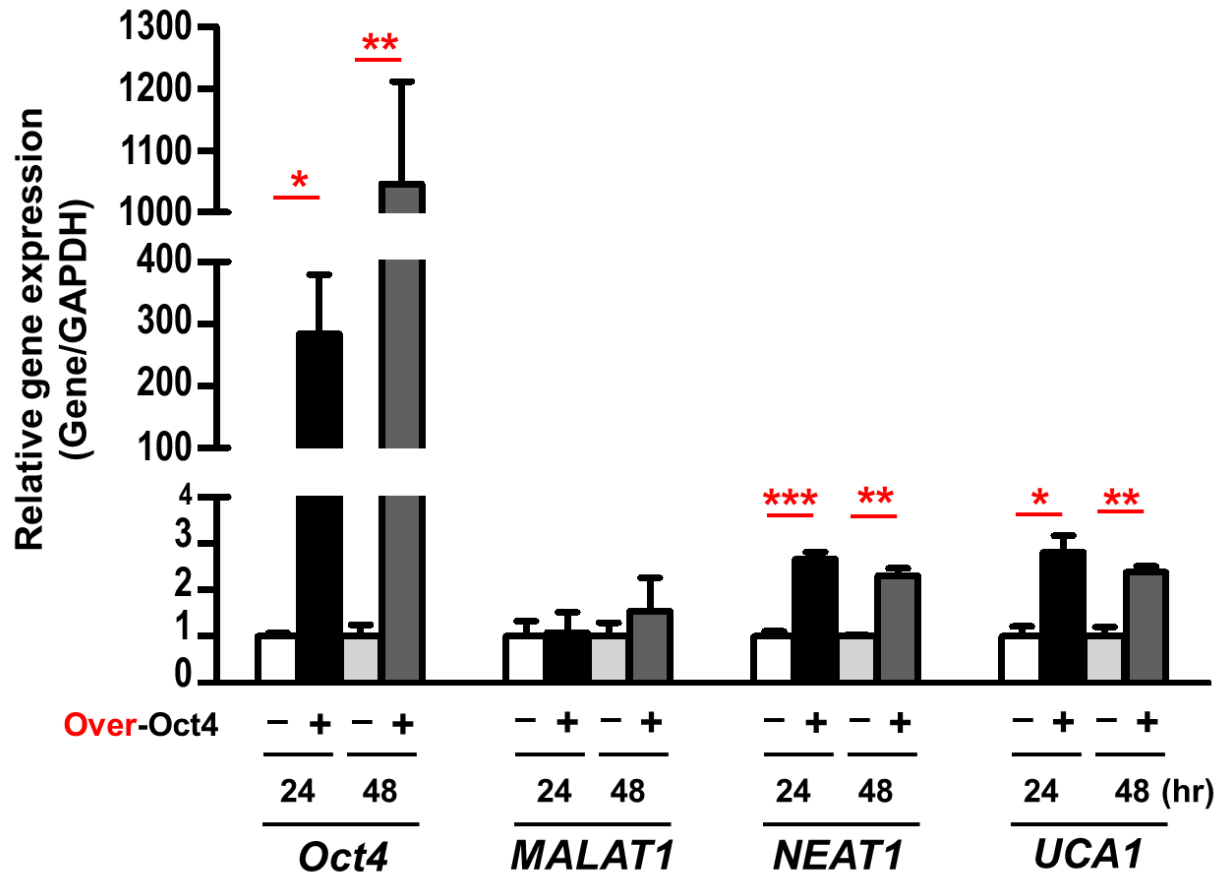

**Figure S3** Oct4 positively regulated *NEAT1* and *UCA1* lncRNAs transcription in normal bronchial epithelial BEAS-2B cells. qRT-PCR analysis of selected lncRNAs expressions in BEAS-2B cells overexpressing Oct4. Target lncRNA expression levels were normalized to *GAPDH* expression levels. Data represent mean  $\pm$  SEM. *P*-values were determined by two-tailed Student's *t*-test. \**P* < 0.05; \*\**P* < 0.01; \*\*\**P* < 0.001.

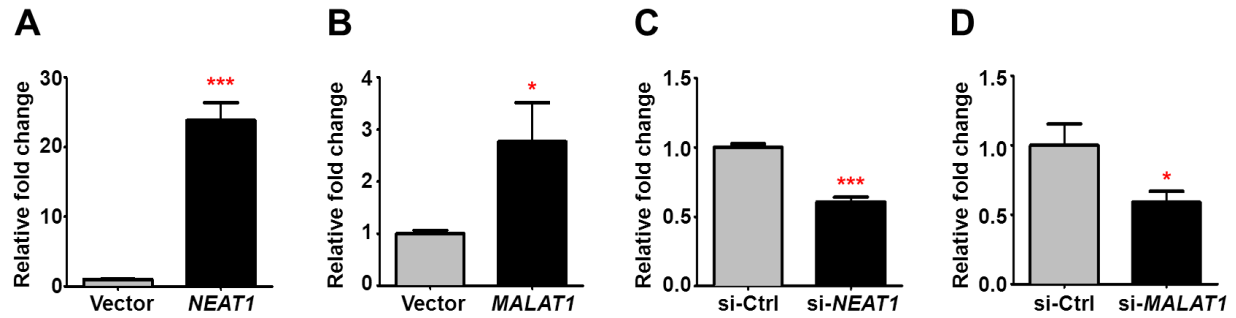

**Figure S4** RNA expression level of the manipulated *NEAT1* and *MALAT1* in A549 lung cancer cells. A549 cells transfected with *NEAT1* expression vector (**A**) or *MALAT1* expression vector (**B**), si-*NEAT1* oligo (si-*NEAT1*) (**C**) or si-*MALAT1* oligo (si-*MALAT1*) (**D**) were harvested and subjected to qRT-PCR assays for *NEAT1* and *MALAT1* RNA expression. Data are mean  $\pm$  SEM. *P*-values were determined by two-tailed Student's *t*-test. \**P* < 0.05; \*\*\**P* < 0.001.

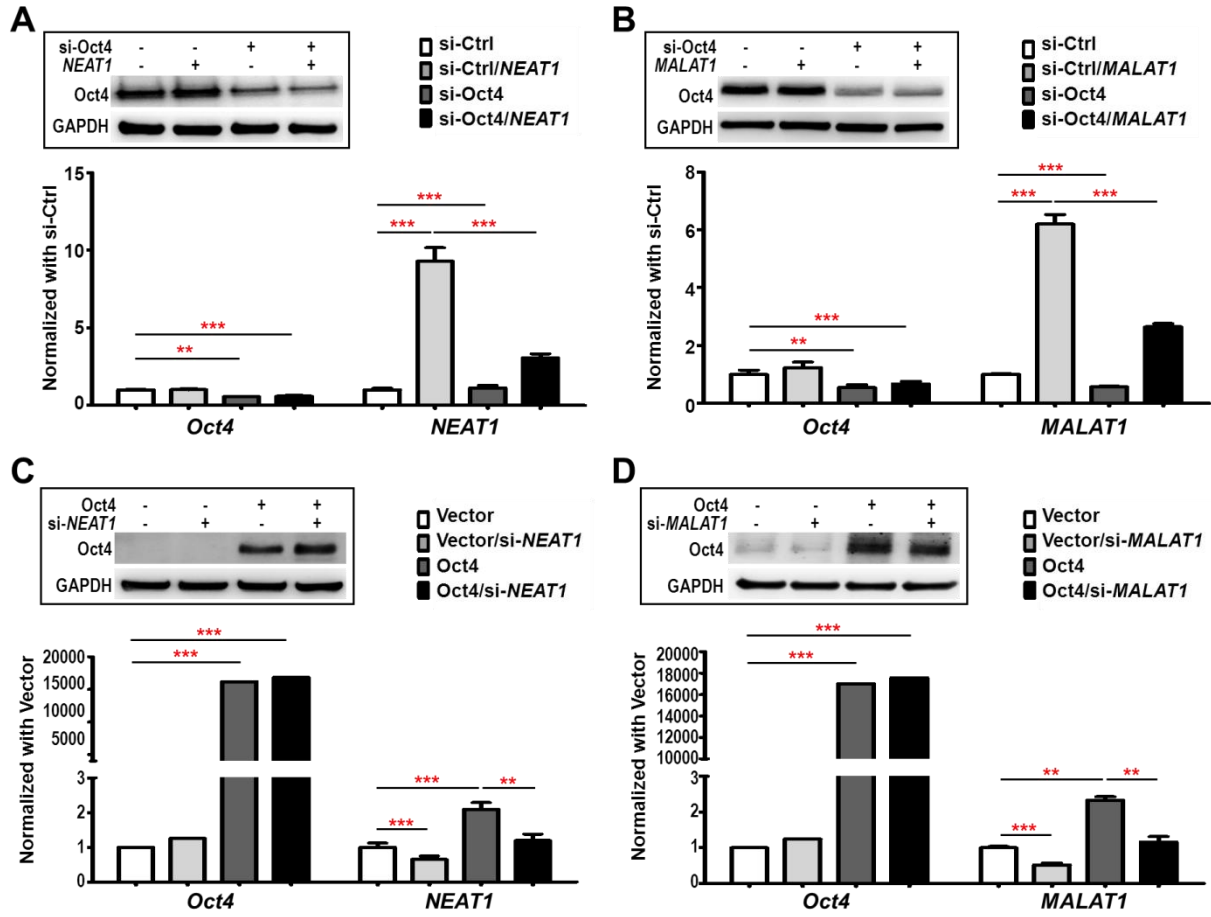

**Figure S5** RNA and protein expression level of the manipulated Oct4, *NEAT1* and *MALAT1* in A549 lung cancer cells. A549 cells were transfected with expression vectors of *NEAT1* (A) or *MALAT1* (B) alone or together with si-Oct4 oligo (si-Oct4). A549 cells were transfected with si-*NEAT1* oligo (si-*NEAT1*) (C) or si-*MALAT1* oligo (si-*MALAT1*) (D) alone or together with Oct4 expression vector. Cell lysates were subjected to qRT-PCR assays for *Oct4*, *NEAT1* and *MALAT1* RNA expression or Western blot analysis for Oct4 protein expression (inset). GAPDH serves as an internal control. Data are mean  $\pm$  SEM. *P*-values were determined by two-way ANOVA. \*\**P* < 0.01; \*\*\**P* < 0.001.
